# Supplementary material for: A ferrocene–pyrene based ‘turn-on’ chemodosimeter for Cr3+– application in bioimaging
Source: Royal Society of Chemistry journal article supplement (doi:10.1039/c3dt53536c), 2014-01-01
Supplement: c3dt53536c.pdf [file c3dt53536c.pdf]

Supporting Information (SI)

# A ferrocene-pyrene based 'turn-on' chemodosimeter for Cr<sup>3+</sup> - Application in Bioimaging

Mandeep Kaur,<sup>a</sup> Paramjit Kaur,<sup>\*a</sup> Vikram Dhuna,<sup>b</sup> Sukhdev Singh,<sup>b</sup> Kamaljit Singh,<sup>\*a</sup>

<sup>a</sup>Department of Chemistry, UGC-Centre of Advance Studies-I, <sup>b</sup>Department of Molecular Biology and Biochemistry, Guru Nanak Dev University, Amritsar- 143 005, India.

E-mail: [paramjit19in@yahoo.co.in](mailto:paramjit19in@yahoo.co.in); [kamljit19in@yahoo.co.in](mailto:kamljit19in@yahoo.co.in)

## Table of Contents

|                                                                                                                            |       |
|----------------------------------------------------------------------------------------------------------------------------|-------|
| 1. Isolation of the hydrolytic by-products of the titration of 1 with Cr <sup>3+</sup> .                                   | S1    |
| 2. Characterization of compound 1 ( <sup>1</sup> H, <sup>13</sup> C, mass, IR)                                             | S1-S3 |
| 3. Changes in the emission spectra of 1 with increasing [Cr <sup>3+</sup> ].                                               | S3    |
| 4. Selected data of electronic transitions in 1 by TD-DFT calculations and contour surfaces of the corresponding orbitals. | S4    |
| 5. Comparison of <sup>1</sup> H NMR spectrum of 1, its hydrolytic products and 1+Cr <sup>3+</sup> .                        | S5    |
| 6. Changes in the <sup>1</sup> H NMR spectra of 1 upon addition of Cr <sup>3+</sup> , after 24 h.                          | S6    |
| 7. Mass spectra of 1 with and without addition of Cr <sup>3+</sup> .                                                       | S7    |
| 8. Cartesian coordinates of the optimized structure of 1.                                                                  | S8    |
| 9. Complete reference no. 12                                                                                               | S9    |

### Isolation of the hydrolytic by-products of the titration of **1** with Cr<sup>3+</sup>

A solution of **1** (3.5 ml,  $5.0 \times 10^{-6}$  M) in (THF:water, 1:99 v/v) was titrated with increasing concentration (from  $2.85 \times 10^{-6}$  M to  $5.0 \times 10^{-4}$  M) of an aqueous solution of Cr<sup>3+</sup> [Cr(ClO<sub>4</sub>)<sub>3</sub>·6H<sub>2</sub>O]. At the end of the titration, the solution was extracted with hexane (2 ml). Thin layer chromatography (TLC) revealed the presence of 1-ferrocenecarboxaldehyde upon comparison with authentic sample. Further, recording of the mass spectrum and <sup>1</sup>H NMR spectrum of the crude product showed the presence of 1-ferrocenecarboxaldehyde and 1-aminopyrene, respectively (Fig S8-S9). Subsequently, the aqueous layer was extracted with ethyl acetate (2 ml). TLC analysis of the ethyl acetate layer revealed the presence of 1-aminopyrene upon comparison with authentic sample.

In order to isolate the by-products, to a solution of **1** (0.002 g) in THF:H<sub>2</sub>O (1:99, v/v, 0.7 ml) an aqueous solution of Cr(ClO<sub>4</sub>)<sub>3</sub>·6H<sub>2</sub>O (0.1 M, 48 μl) was added and the solution stirred for two hours. After extractive workup of the reaction, as described above, 1-ferrocenecarboxaldehyde and 1-aminopyrene was isolated in quantity enough for recording the spectroscopic data as well as TLC comparison with authentic samples.

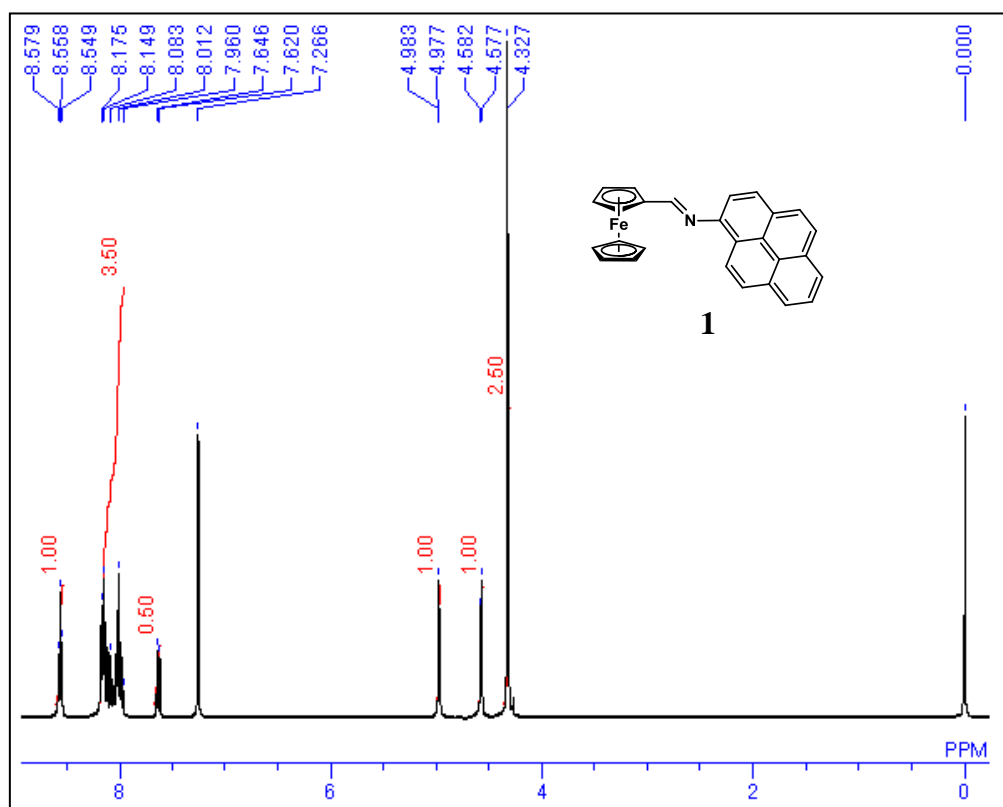

**Fig. S1** <sup>1</sup>H NMR spectra of **1** in CDCl<sub>3</sub>.

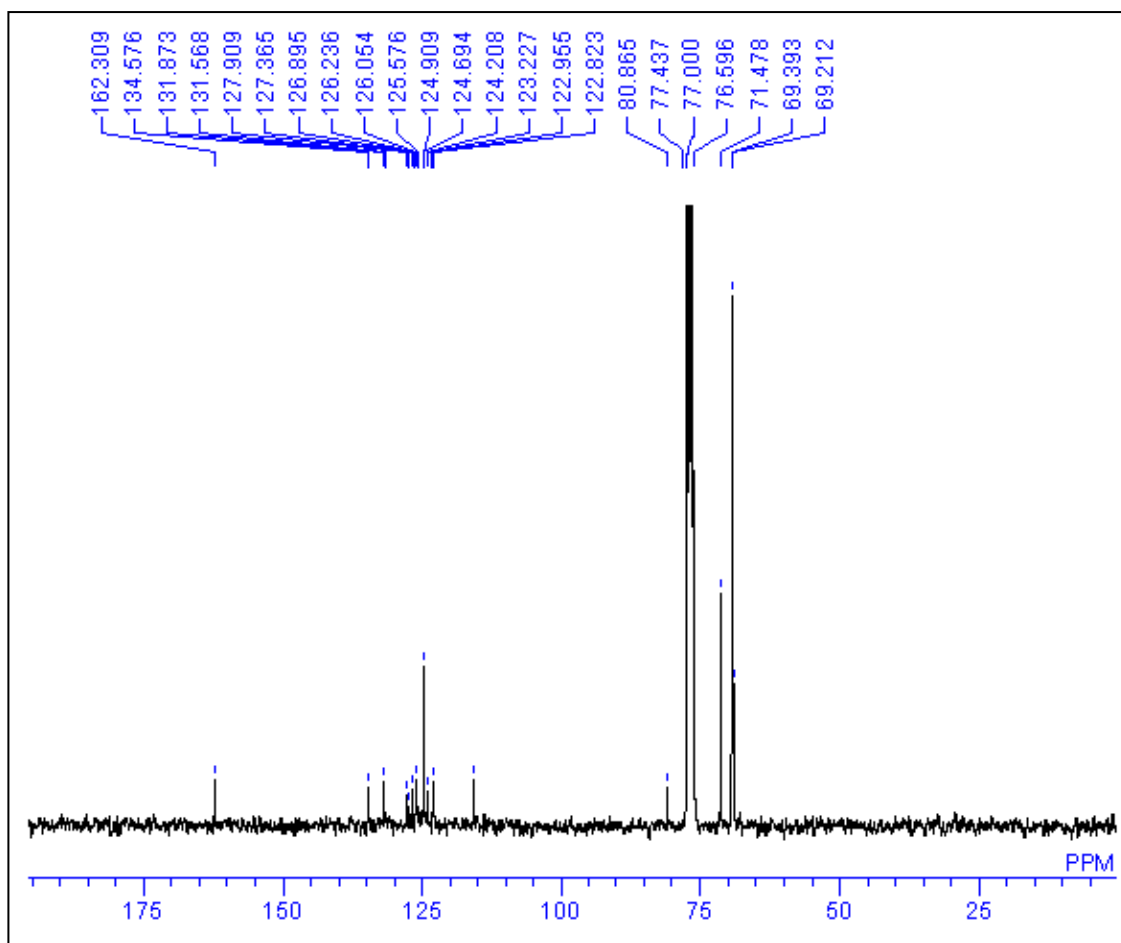

Fig. S2  $^{13}\text{C}$  NMR spectra of **1** in  $\text{CDCl}_3$ .

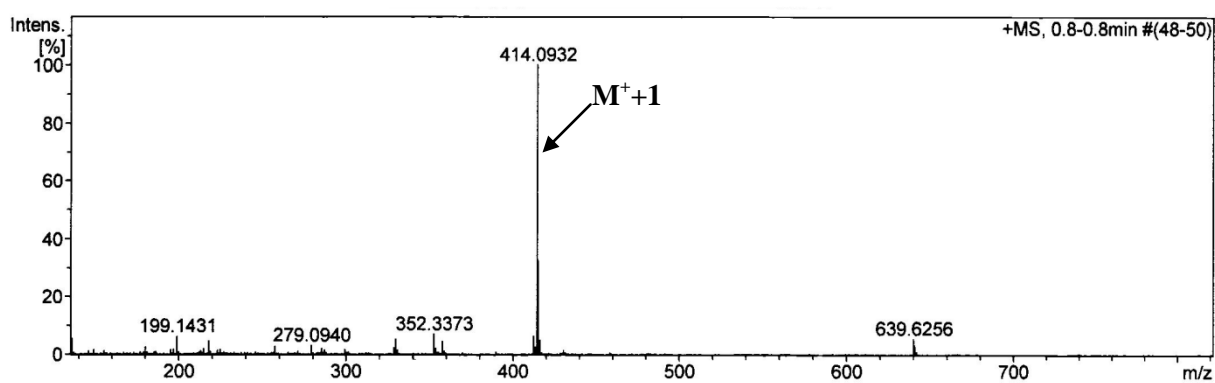

Fig. S3 Mass spectra of **1** (solid).

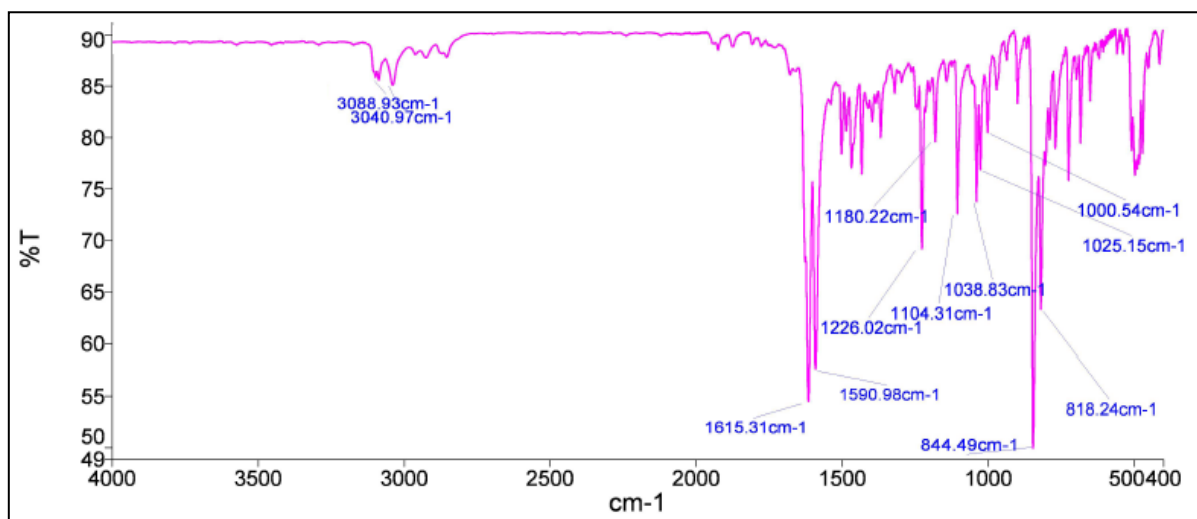

Fig. S4 IR (KBr) spectra of **1**.

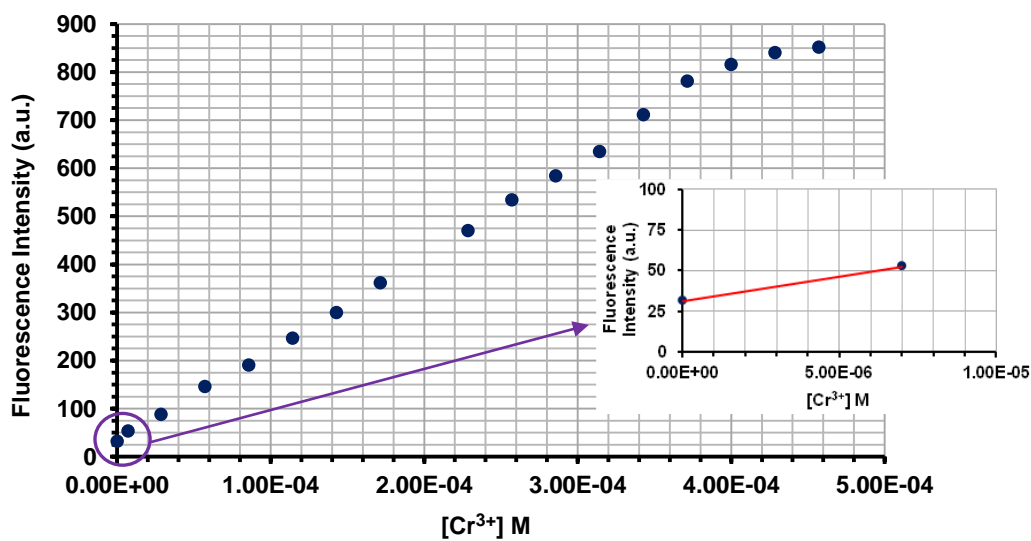

Fig. S5 Increase in the emission intensity at 442 nm of **1** ( $5 \times 10^{-6}$  M, in THF) upon addition of increasing amount of  $\text{Cr}^{3+}$  ( $2.85 \times 10^{-6}$  M -  $5.0 \times 10^{-4}$  M, in  $\text{H}_2\text{O}$ ) in THF: $\text{H}_2\text{O}$ . (The  $v/v$  ratio of THF and  $\text{H}_2\text{O}$  in the mixture was 1:99). Inset: Graph depicting  $1 \times 10^{-6}$  M concentration (detection limit) of  $\text{Cr}^{3+}$  to be the lowest to be detected by the chemodosimeter **1**.

Table S1. Selected data of electronic transitions in **1** by TD-DFT calculations using B3LYP/Gen method.

| $\lambda$ [ nm/ (eV) ] | $f^a$  | Composition of bands and CI <sup>b</sup> coefficients |
|------------------------|--------|-------------------------------------------------------|
| 498 (2.49)             | 0.0129 | H-2 $\rightarrow$ L+3, 0.42                           |
| 406 (3.05)             | 0.6992 | H $\rightarrow$ L, 0.67; H $\rightarrow$ L+1, 0.11    |
| 296 (4.18)             | 0.2721 | H -3 $\rightarrow$ L, 0.47; H $\rightarrow$ L+4, 0.31 |
| 290 (4.28)             | 0.1043 | H $\rightarrow$ L+4, 0.48                             |
| 246 (5.04)             | 0.1534 | H-5 $\rightarrow$ L+2, 0.48                           |

<sup>a</sup> $f$ - oscillator strength, <sup>b</sup>CI- configurational intergration coefficient, H - HOMO, L - LUMO.

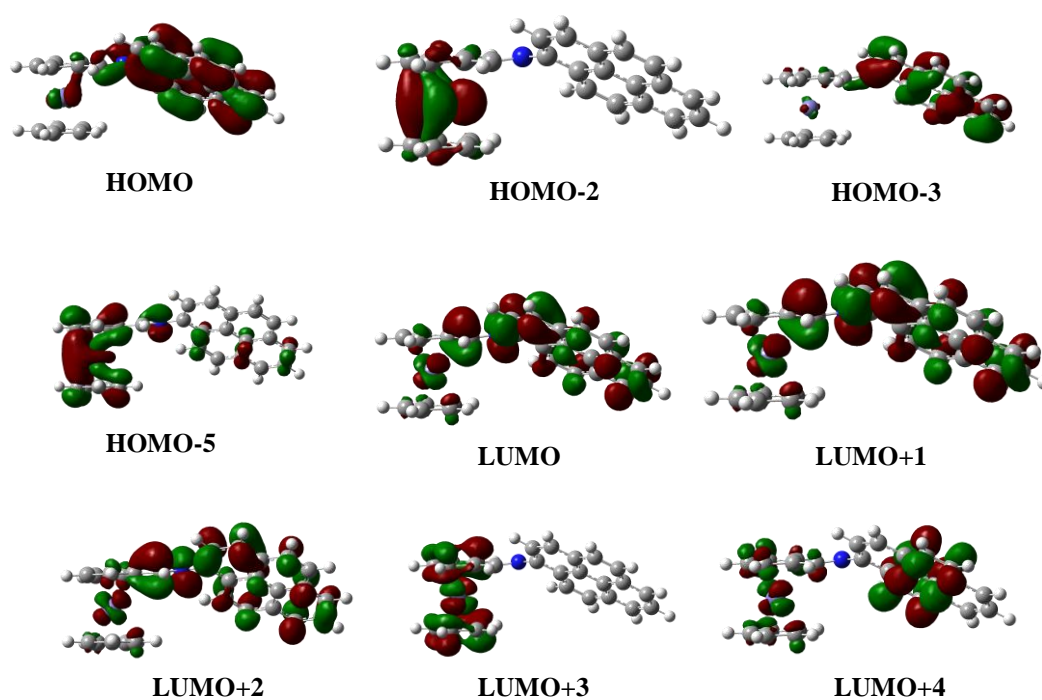

**Fig. S6** Frontier molecular orbitals of **1** contributing to UV-visible absorption bands (isovalue=0.03).

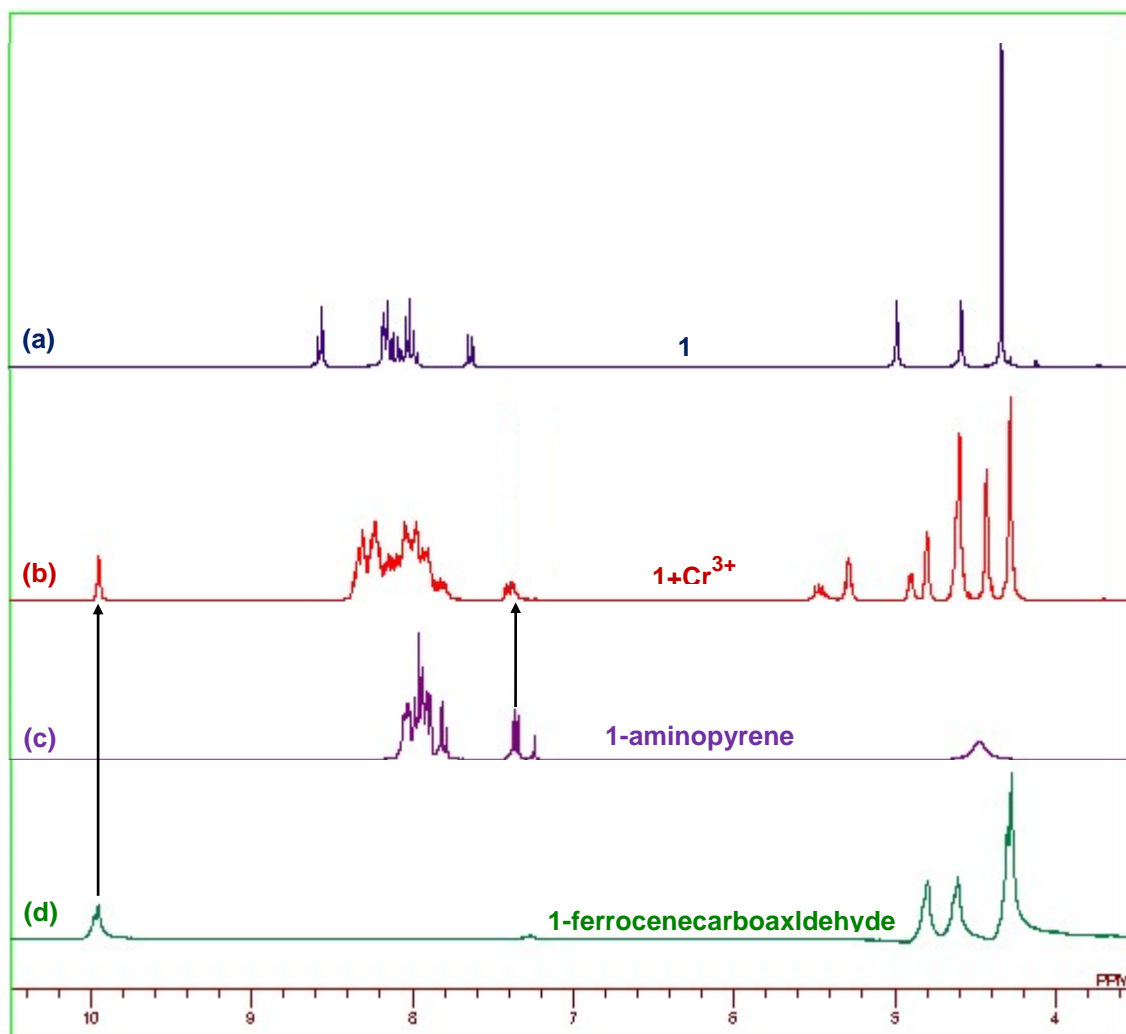

**Fig. S7** <sup>1</sup>H NMR spectra of (a) **1**, (b) **1+Cr<sup>3+</sup>**, (c) 1-aminopyrene and (d) 1-ferrocenecarboxaldehyde.

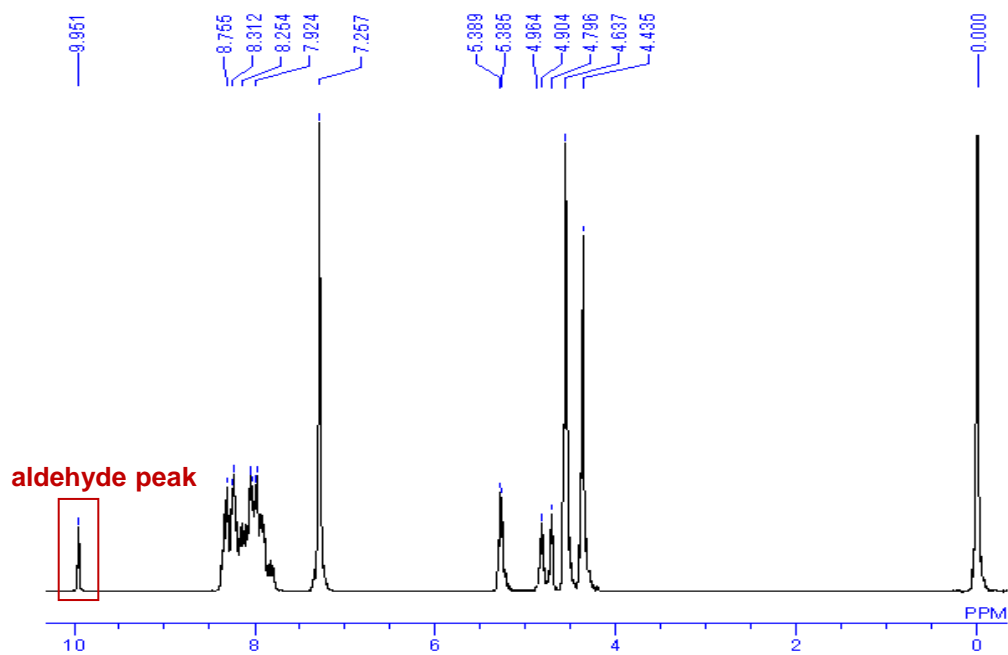

**Fig. S8** Changes in the  $^1\text{H}$  NMR spectrum of **1** (in  $\text{CDCl}_3$ ) upon addition of  $\text{Cr}^{3+}$  (1 equiv., in  $\text{CD}_3\text{CN}$ ) perchlorate salt, recorded after equilibration (24 h).

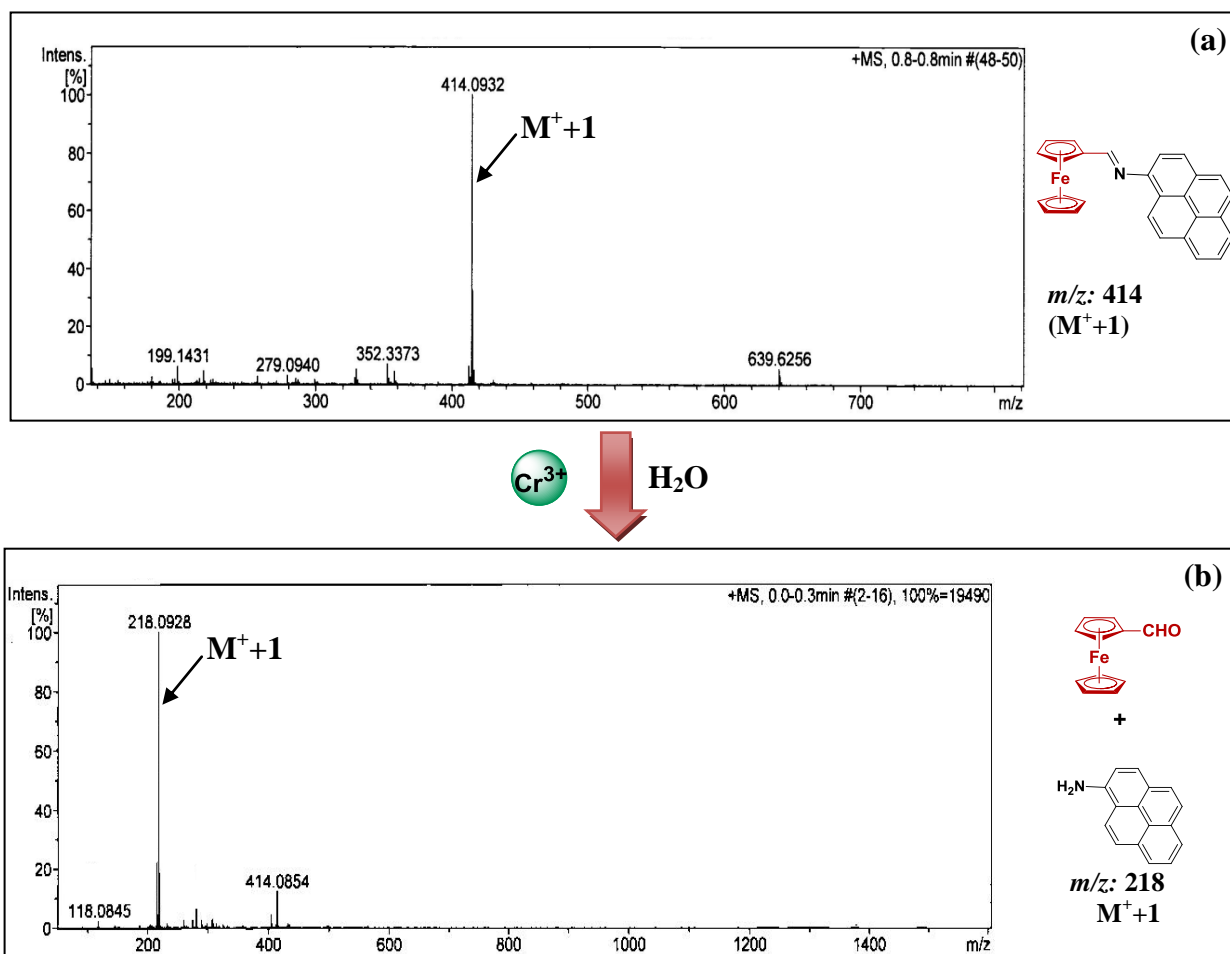

**Fig. S9** Mass spectra of (a) **1** and (b) **1** upon addition of  $Cr^{3+}$  in THF:H<sub>2</sub>O (1:99/v/v).



Table S2: Cartesian coordinates of **1**.

SCF Done: E (RB3LYP) = -1218.55825268 a.u. after 10 cycles.

| Center | Atomic | Coordinates (Angstroms) |           |           |
|--------|--------|-------------------------|-----------|-----------|
| Number | Number | X                       | Y         | Z         |
| 1      | 26     | -4.020996               | -0.253293 | 0.105144  |
| 2      | 6      | -1.388339               | 1.471496  | -0.14879  |
| 3      | 1      | -1.262641               | 2.063628  | 0.770524  |
| 4      | 6      | -2.763211               | 1.261395  | -0.579942 |
| 5      | 6      | -3.222745               | 0.462023  | -1.681011 |
| 6      | 1      | -2.583800               | -0.106271 | -2.342006 |
| 7      | 6      | -4.642022               | 0.543843  | -1.722785 |
| 8      | 1      | -5.286336               | 0.029774  | -2.423948 |
| 9      | 6      | -5.076597               | 1.380011  | -0.647087 |
| 10     | 1      | -6.103356               | 1.611341  | -0.396419 |
| 11     | 6      | -3.923880               | 1.818463  | 0.062314  |
| 12     | 1      | -3.913803               | 2.451574  | 0.940369  |
| 13     | 6      | -2.979358               | -1.487740 | 1.421653  |
| 14     | 1      | -1.939027               | -1.350119 | 1.685885  |
| 15     | 6      | -3.467326               | -2.246898 | 0.316436  |
| 16     | 1      | -2.862484               | -2.788181 | -0.398824 |
| 17     | 6      | -4.890966               | -2.129179 | 0.295228  |
| 18     | 1      | -5.553958               | -2.564518 | -0.440829 |
| 19     | 6      | -5.281464               | -1.296626 | 1.387472  |
| 20     | 6      | -4.099689               | -0.898280 | 2.083113  |
| 21     | 1      | -4.058620               | -0.244003 | 2.944113  |
| 22     | 7      | -0.381876               | 1.004909  | -0.783636 |
| 23     | 6      | 0.921758                | 1.312207  | -0.373417 |
| 24     | 6      | 1.910411                | 0.294418  | -0.433535 |
| 25     | 6      | 1.287113                | 2.607333  | 0.032643  |
| 26     | 6      | 3.246133                | 0.597753  | -0.031748 |
| 27     | 6      | 1.604957                | -1.039903 | -0.866204 |
| 28     | 6      | 2.592301                | 2.904086  | 0.405367  |
| 29     | 1      | 0.537711                | 3.393512  | 0.018307  |
| 30     | 6      | 4.246240                | -0.422073 | -0.055871 |
| 31     | 6      | 3.591297                | 1.917654  | 0.394270  |
| 32     | 6      | 2.561489                | -2.010639 | -0.890107 |
| 33     | 1      | 0.589731                | -1.250269 | -1.184080 |
| 34     | 1      | 2.850422                | 3.917189  | 0.704759  |
| 35     | 6      | 3.912170                | -1.743971 | -0.481860 |

|    |   |           |           |           |
|----|---|-----------|-----------|-----------|
| 36 | 6 | 5.585593  | -0.123317 | 0.345404  |
| 37 | 6 | 4.945805  | 2.189465  | 0.784855  |
| 38 | 1 | 2.314220  | -3.014523 | -1.227656 |
| 39 | 6 | 4.912039  | -2.731560 | -0.494167 |
| 40 | 6 | 6.550183  | -1.143671 | 0.315841  |
| 41 | 6 | 5.898198  | 1.215753  | 0.764251  |
| 42 | 1 | 5.197172  | 3.198570  | 1.103130  |
| 43 | 6 | 6.214254  | -2.431959 | -0.098934 |
| 44 | 1 | 4.657278  | -3.737741 | -0.818229 |
| 45 | 1 | 7.569014  | -0.917200 | 0.620879  |
| 46 | 1 | 6.919005  | 1.437201  | 1.066405  |
| 47 | 1 | 6.974675  | -3.208214 | -0.114849 |
| 48 | 1 | -6.292221 | -0.990989 | 1.623893  |

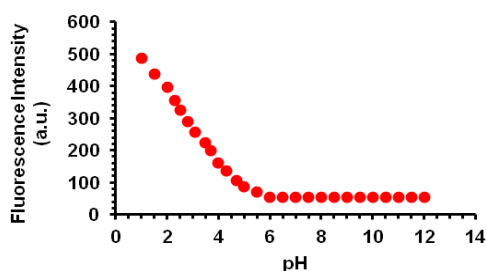

**Fig. S10** Changes in the emission of **1** ( $5.0 \times 10^{-6}$  M) upon pH titration with HCl (0.001 M) and NaOH (0.01 M) in THF:H<sub>2</sub>O (1:99/v/v) at 442 nm.

### Complete Reference 12

*Gaussian 09, Revision B.01*, M. J. Frisch, G. W. Trucks, H. B. Schlegel, G. E. Scuseria, M. A. Robb, J. R. Cheeseman, G. Scalmani, V. Barone, B. Mennucci, G. A. Petersson, H. Nakatsuji, M. Caricato, X. Li, H. P. Hratchian, A. F. Izmaylov, J. Bloino, G. Zheng, J. L. Sonnenberg, M. Hada, M. Ehara, K. Toyota, R. Fukuda, J. Hasegawa, M. Ishida, T. Nakajima, Y. Honda, O. Kitao, H. Nakai, T. Vreven, J. A. Montgomery, Jr., J. E. Peralta, F. Ogliaro, M. Bearpark, J. J. Heyd, E. Brothers, K. N. Kudin, V. N. Staroverov, T. Keith, R. Kobayashi, J. Normand, K. Raghavachari, A. Rendell, J. C. Burant, S. S. Iyengar, J. Tomasi, M. Cossi, N. Rega, J. M. Millam, M. Klene, J. E. Knox, J. B. Cross, V. Bakken, C. Adamo, J. Jaramillo, R. Gomperts, R. E. Stratmann, O. Yazyev, A. J. Austin, R. Cammi, C. Pomelli, J. W. Ochterski, R. L. Martin, K. Morokuma, V. G. Zakrzewski, G. A. Voth, P. Salvador, J. J. Dannenberg, S. Dapprich, A. D. Daniels, O. Farkas, J. B. Foresman, J. V. Ortiz, J. Cioslowski, and D. J. Fox, Gaussian, Inc., Wallingford CT, 2010.
